# Supplementary material for: Signal peptide peptidase activity connects the unfolded protein response to plant defense suppression by Ustilago maydis
Source: PLoS Pathog. 2019 Apr 18;15(4):e1007734. doi: 10.1371/journal.ppat.1007734 (PMC6490947; doi:10.1371/journal.ppat.1007734)
Supplement: S3 Table — (XLSX) [file ppat.1007734.s020.xlsx]

## Sheet: Blatt1
S3 Table: UPR core gene expression after TM treatment and during biotrophic development
	Reads in RPKM		RPKMs derived from Lanver et al 2018 (1)
stable id	JB1	JB1 +TM	axenic	2dpi	4 dpi	6dpi	up in planta	not changed	down in planta
UMAG_12149	0.588079	37.3833	0.559939	102.157	72.5511	45.3252	x
UMAG_03034	2.52779	93.7792	16.851	43.871	220.134	298.162	x
UMAG_00204	2.80329	83.0185	4.02771	21.2027	33.2766	31.7716	x
UMAG_11594	27.0545	599.655	27.1453	96.162	84.2456	103.515	x
UMAG_05219	17.6045	322.508	20.6563	145.067	117.94	100.773	x
UMAG_11651	4.11646	72.1007	0.645846	6.51988	53.2933	132.196	x
UMAG_15034	503.483	6760.06	621.803	3634.12	2459.54	2177.13	x
UMAG_11641	44.0843	543.93	13.6769	176.597	224.418	227.335	x
UMAG_11002	0.688629	13.5744	0.753921	1.67531	801.268	1257.53	x
UMAG_03541	0.454965	5.92412	0.280482	39.1077	61.4387	38.9142	x
UMAG_11190	0.348438	6.37782	1.10664	151.927	211.095	126.966	x
UMAG_00904	117.229	1091.2	65.065	535.047	316.107	260.149	x
UMAG_04987	460.132	4161.51	18.9687	709.99	1090.77	877.923	x
UMAG_05173	134.062	1169.77	108.093	816.138	689.246	603.176	x
UMAG_03404	0.342777	3.3083	0.01	15.2491	15.8879	7.21202	x
UMAG_11513	9.72529	77.7719	2.28027	25.3629	26.4148	31.3544	x
UMAG_02729	78.9065	615.827	91.4111	1027.68	799.162	556.134	x
UMAG_10156	418.979	3255.34	578.315	4065.67	4005.24	3576.58	x
UMAG_11709	0.442656	3.67892	0.854174	4.61207	62.1445	139.5	x
UMAG_02727	10.7644	74.9086	1.06932	67.4852	83.2241	77.8447	x
UMAG_11763	1.93615	13.8203	0.774902	3567.2	2259.54	688.317	x
UMAG_05352	151.913	1045.05	83.8536	692.897	602.096	425.069	x
UMAG_04355	24.9212	169.169	42.982	198.821	138.083	129.702	x
UMAG_03294	1.75628	13.3182	1.31898	7915.84	6565.43	3891.36	x
UMAG_01524	8.3311	56.4123	2.62397	4.0344	10.4208	76.592	x
UMAG_11824	0.631684	4.17827	0.730368	41.2711	24.4004	25.4575	x
UMAG_00481	84.8122	540.717	182.828	519.786	417.907	328.947	x
UMAG_12178	9.12188	58.9314	4.71653	212.911	1726.93	1927.67	x
UMAG_05811	2.28359	15.0817	3.08366	5.18673	9.27008	13.4711	x
UMAG_05009	0.196282	2.7662	0.11173	0	3.03728	2.282	x
UMAG_10099	107.667	643.426	136.407	765.605	563.366	449.121	x
UMAG_02081	120.545	711.515	130.195	451.378	246.748	193.525	x
UMAG_04531	41.7227	240.031	44.3711	234.701	269.938	233.114	x
UMAG_10006	86.3161	489.829	82.9706	415.714	252.067	226.846	x
UMAG_00542	29.4893	162.624	37.5324	116.702	102.068	88.729	x
UMAG_10921	62.7463	338.036	59.5574	199.861	113.167	101.682	x
UMAG_06480	117.053	629.176	73.5371	172.995	142.545	158.549	x
UMAG_02487	75.0186	387.555	57.9272	347.124	283.252	245.631	x
UMAG_15029	42.865	216.817	104.883	337.325	336.644	315.098	x
UMAG_12304	6.25742	31.9991	2.87845	4.07248	43.4162	34.5202	x
UMAG_01112	21.3362	103.783	21.6965	46.8201	36.2591	36.8314	x
UMAG_05898	90.6419	437.728	60.4692	238.654	269.071	242.661	x
UMAG_01512	23.5975	111.398	15.4612	87.5536	49.2849	39.6232	x
UMAG_12318	0.0374127	0.677865	0.0732014	10.2602	1.72557	0	x
UMAG_04896	113.011	517.856	157.524	602.765	478.689	429.596	x
UMAG_11083	108.223	493.451	205.88	563.69	414.132	386.166	x
UMAG_06175	110.384	500.686	141.383	468.625	409.53	356.141	x
UMAG_06089	91.7986	411.563	157.435	543.693	414.792	405.342	x
UMAG_10686	25.5315	112.577	35.1208	99.4583	88.4025	78.4722	x
UMAG_03713	1.13412	6.08058	4.21883	9.95257	25.7499	55.9085	x
UMAG_00258	28.0579	118.135	17.4641	32.9506	39.6867	40.2938	x
UMAG_04980	58.767	1223.44	77.8619	113.734	118.558	133.098		x
UMAG_00223	5.40195	59.2091	10.785	20.1694	15.6631	15.4931		x
UMAG_04605	116.771	587.605	207.99	370.886	288.698	289.416		x
UMAG_11799	14.6625	70.4145	27.929	51.8671	54.5385	47.7154		x
UMAG_02944	38.2921	174.359	70.1965	128.292	96.4489	93.7287		x
UMAG_01162	29.0888	129.836	31.3248	60.8652	43.5891	44.1735		x
UMAG_01232	47.3089	208.194	73.9664	82.8373	136.1	135.24		x
UMAG_06140	65.0323	284.355	203.201	134.375	177.523	202.937		x
UMAG_01988	46.6774	507.374	39.4599	14.8442	15.2445	15.1633			x
UMAG_03665	0.57814	4.65184	876.194	87.5432	52.6665	71.8176			x
UMAG_03507	133.434	698.428	53.0407	7.53533	6.28548	39.5009			x
UMAG_01025	1.04524	5.103	30.3839	2.00426	8.12301	17.027			x
UMAG_00007	181.956	801.772	232.607	139.137	85.1356	91.7341			x
UMAG_12332	11.9325	49.0366	56.6261	0.500486	0.762699	1.62387			x
UMAG_10221	176.52	43.8829	256.824	1.74491	11.8917	45.8643			x
UMAG_06138	5.63424	1.347	357.989	161.49	161.325	221.968			x
UMAG_12265	9.24606	2.18611	38.0757	13.2434	19.9524	15.5852			x
UMAG_03585	3.45853	0.733966	11.0547	3.48471	12.9238	9.56299			x
UMAG_00384	9.71235	2.13354	89.6532	54.3084	35.0841	12.6704			x
UMAG_04044	124.978	28.0123	215.095	263.765	71.5475	64.6898			x
UMAG_00896	19.7639	3.98672	60.0588	25.9486	33.9294	29.8448			x
UMAG_00224	588.356	130.121	163.817	7.95575	15.4199	18.7511			x
UMAG_00144	11.6749	2.16999	117.802	13.4686	28.4979	33.5891			x
UMAG_11606	37.0188	6.73387	33.8294	59.4533	35.7675	13.1454			x
UMAG_03992	42.4732	7.83239	73.1959	17.3397	22.2812	26.3918			x
UMAG_10002	16.4037	2.94186	109.224	27.2053	12.1715	14.4192			x
UMAG_05514	2.9579	0.337416	46.1269	2.57745	4.6363	4.40685			x
UMAG_00096	158.596	22.1699	118.308	85.4249	80.7882	40.3094			x
UMAG_00029	75.0839	10.2668	221.445	106.991	211.037	288.464			x
UMAG_10120	25.557	2.97977	49.7777	24.4185	17.2522	18.2626			x
UMAG_02758	350.501	21.2661	520.043	4.85834	5.33755	247.821			x
UMAG_04683	18.2737	1.52815	203.902	7.86362	2.53498	6.7923			x
UMAG_00567	45.5661	4.94013	41.692	17.1418	20.5717	23.8552			x
UMAG_01900	52.6249	5.24607	337.273	8.12048	16.7855	43.981			x
UMAG_10886	52.5795	5.15282	148.44	53.3589	52.2852	45.6246			x
UMAG_03776	69.0443	3.59482	216.92	18.6528	13.9727	13.837			x
UMAG_10885	14.7071	1.22013	124.494	32.5056	21.3185	22.2739			x
UMAG_04686	25.7788	1.56786	292.341	2.42902	10.1556	19.613			x
UMAG_03547	21.9693	0.932749	95.7472	12.722	17.6132	22.9347			x
UMAG_02801	53.2862	2.97937	79.4274	28.8643	39.4747	62.2582			x
UMAG_02803	39.5039	1.13788	36.206	0.283698	0	0.407134			x
UMAG_10863	26.8048	5.59631	42.6003	27.2816	39.7466	44.1145		x
UMAG_00810	19.8676	3.58698	23.2072	17.3605	15.8407	15.1047		x
UMAG_11592	8.17132	1.45291	17.9633	15.0297	11.4162	13.843		x
UMAG_03246	179.503	30.5652	32.4444	46.6803	25.9506	26.0374		x
UMAG_04305	34.2124	4.61181	4.47414	4.12835	6.16517	5.89532		x
UMAG_00056	9.24818	0.417658	273.202	350.179	238.623	236.048		x
UMAG_04503	1386.26	311.58	0.0526877	131.624	1973.17	615.33	x
UMAG_03117	23.7299	5.06086	0.227883	3.27258	1.89727	2.73826	x
UMAG_02985	79.751	16.4207	1.05966	228.804	207.397	184.273	x
UMAG_03932	1.34366	0.196884	1.92827	10.0846	5.19348	4.77801	x
UMAG_12238	123.036	24.0602	0.0488306	3.16385	0	0.33691	x
UMAG_12015	123.003	24.0204	0.0170509	5.42177	2.17542	1.01073	x
UMAG_06350	275.14	52.4662	0.649678	5.57726	8.17732	2.52835	x
UMAG_06085	4.5389	0.74096	0.844011	99.3857	54.0626	39.953	x
UMAG_10055	24.5035	4.10165	0.52085	1769.24	1410.18	932.314	x
UMAG_04304	64.5701	9.63447	5.07702	17.6282	12.1886	13.1728	x
UMAG_02035	18.1935	1.78368	2.02933	34.6911	30.6864	19.8528	x
UMAG_00465	18.3335	1.33787	15.9548	64.137	19.2191	19.4158	x
UMAG_06012	12.3449	0.852043	145.635	348.242	404.188	649.313	x
UMAG_04248	66.8113	3.50144	1.17306	130.674	104.627	51.9954	x
UMAG_00738	19.0223	0.941881	10.2076	326.624	55.4129	20.039	x
UMAG_11244	1.31774	0.024116	0.520543	1.98866	0.923509	1.57569	x
UMAG_11063	13.2678	0.499818	11.2021	80.8201	36.3189	17.6688	x
(1) Lanver D, Müller AN, Happel P, Schweizer G, Haas FB, et al. (2018) The Biotrophic Development of Ustilago maydis Studied by RNA-Seq Analysis. Plant Cell 30: 300-323
		induced by TM
		repressed by TM
